# Supplementary material for: Competition between cheatgrass and bluebunch wheatgrass is altered by temperature, resource availability, and atmospheric CO2 concentration
Source: PubMed Central journal article supplement (PMC5829107; doi:10.1007/s00442-017-4046-6), 2017-12-22
Supplement: 442_2017_4046_MOESM1_ESM.pdf [file 442_2017_4046_MOESM1_ESM.pdf]

| Treatment | Temperature | NPK | Water |
|-----------|-------------|-----|-------|
| 1         | +           | +   | +     |
| 2         | +           | +   | -     |
| 3         | +           | -   | +     |
| 4         | +           | -   | -     |
| 5         | -           | +   | +     |
| 6         | -           | +   | -     |
| 7         | -           | -   | +     |
| 8         | -           | -   | -     |

**Online Resource 1** Full factorial experimental design for experiment one across two temperature levels, ambient (-) and elevated (+), two nutrient levels, ambient (-) and elevated (+), and two water levels, ambient (+) and decreased (-). The eight treatment combinations were replicated twice in each of the five density treatments for both trials
